# Supplementary material for: Targeting of SUMOylation leads to cBAF complex stabilization and disruption of the SS18::SSX transcriptome in Synovial Sarcoma
Source: Research Square preprint supplement (doi:10.21203/rs.3.rs-4362092/v1), 2024-06-05
Supplement: Supplementary file 1 [file 9ee5a4c80d00339e71081975.docx]

**Sequencing Dataset**

Sequencing deposited to GEO

Accession code: GSE266135

Reviewer token: gxezcmsurtundyf

<https://www.ncbi.nlm.nih.gov/geo/query/acc.cgi?acc=GSE266135>
